# Supplementary material for: A Single Shot Pre-fusion-Stabilized Bovine RSV F Vaccine is Safe and Effective in Newborn Calves with Maternally Derived Antibodies
Source: MDPI journal article supplement (doi:10.3390/vaccines8020231), 2020-05-18
Supplement: s1 [file s1]

**Table S1.** List of calves and allocation to experimental groups based on BRSV-MDA titers and age.

| Group        | ID                | Age of the Calves<br>at Time of<br>vaccination (Days) | IgG in<br>Sera<br>(g/dL) <sup>1</sup> | MDA<br><sub>2</sub> | Systemic Reaction<br>to Vaccination<br>$\Delta(TD1-TD0)$ <sup>3</sup> | Local<br>Reaction to<br>Vaccine <sup>4</sup> |
|--------------|-------------------|-------------------------------------------------------|---------------------------------------|---------------------|-----------------------------------------------------------------------|----------------------------------------------|
| ISA61        | 6431              | 23                                                    | 6.3                                   | 6.2                 | 2.1°C                                                                 | none                                         |
|              | 6400              | 50                                                    | 6.3                                   | 15.2                | 0.2°C                                                                 | none                                         |
|              | 6417              | 40                                                    | 6.8                                   | 33.9                | 0.5°C                                                                 | none                                         |
|              | 6567              | 34                                                    | 6.8                                   | 74.3                | 0°C                                                                   | none                                         |
|              | 6434              | 22                                                    | 6.8                                   | 56.9                | 1.9°C                                                                 | none                                         |
|              | 6403 <sup>#</sup> | 48                                                    | 5.8                                   | 44.6                | 0.0°C                                                                 | none                                         |
| preF/ISA61   | 6422              | 35                                                    | 5.8                                   | 2.1                 | 0.9°C                                                                 | none                                         |
|              | 6405              | 48                                                    | 6.8                                   | 13                  | 0.0°C                                                                 | none                                         |
|              | 6568              | 38                                                    | 6.3                                   | 31                  | 1.1°C                                                                 | none                                         |
|              | 6407              | 46                                                    | 6.8                                   | 74.5                | 0.4°C                                                                 | none                                         |
|              | 6427              | 27                                                    | 7.9                                   | 57.8                | 0.1°C                                                                 | none                                         |
|              | 6559              | 24                                                    | 5.8                                   | 65.7                | 1.5°C                                                                 | none                                         |
| PreF+N/ISA61 | 6410              | 44                                                    | 5.8                                   | 2.1                 | 0.9°C                                                                 | none                                         |
|              | 6562              | 26                                                    | 6.8                                   | 19.5                | 0.7°C                                                                 | none                                         |
|              | 6425              | 30                                                    | 6.3                                   | 39.9                | 1.6°C                                                                 | none                                         |
|              | 6401              | 50                                                    | 6.8                                   | 67.3                | 1.2°C                                                                 | none                                         |
|              | 6570              | 40                                                    | 7.4                                   | 57.3                | 1.0°C                                                                 | none                                         |
|              | 6561              | 26                                                    | 7.4                                   | 56                  | 1.2°C                                                                 | none                                         |

<sup>1</sup> The refractive index of calf sera (collected 48 h after birth) was measured with a refractometer and converted to IgG concentration (g/dL). <sup>2</sup> BRSV-specific MDA were measured in sera collected 2 weeks before vaccination and expressed as % COD of the positive BRSV serum provided with the Svanova commercial kit. <sup>3</sup> The rectal temperature of calves was measured the day before vaccination, the day of vaccination (D0, 2016/02/16) and during 3 days after vaccination. The biggest increase was detected between D0 and D1. <sup>4</sup> The local reaction to vaccine was also recorded daily during 5 days (D-1 to D3).

<sup>#</sup> calf 6403 died 3 weeks after vaccination (unknown cause, enterotoxemia suspected).

**Table S2.** Levels of BRSV RNA in nasal secretions and BAL.

| Group        | ID   | BRSV RNA                                     |                  |
|--------------|------|----------------------------------------------|------------------|
|              |      | AUC Nasal Secretions<br>(D0-D7) <sup>1</sup> | BAL <sup>2</sup> |
| ISA61        | 6431 | 6194                                         | 163325           |
|              | 6400 | 11620                                        | 313226           |
|              | 6417 | 3109                                         | 518461           |
|              | 6567 | 678                                          | 196658           |
|              | 6434 | 25                                           | 278787           |
| preF/ISA61   | 6422 | 2                                            | 0                |
|              | 6405 | 0                                            | 0                |
|              | 6568 | 58                                           | 0                |
|              | 6407 | 425                                          | 0                |
|              | 6427 | 0                                            | 0                |
|              | 6559 | 0                                            | 0                |
| PreF+N/ISA61 | 6410 | 0                                            | 0                |
|              | 6562 | 3822                                         | 6918             |
|              | 6425 | 0                                            | 0                |
|              | 6401 | 0                                            | 0                |

|      |     |    |
|------|-----|----|
| 6570 | 44  | 5  |
| 6561 | 221 | 79 |

<sup>1</sup> BRSV RNA titers expressed as TCID<sub>50</sub> equivalents/mL (eq) in nasal secretions determined by the area under the curve from day 0 to day 7 post BRSV challenge. <sup>2</sup> RNA titers expressed as TCID<sub>50</sub> equivalents/mL (eq) in BAL. The cut off of the PCR is 0.7 TCID<sub>50</sub> eq.

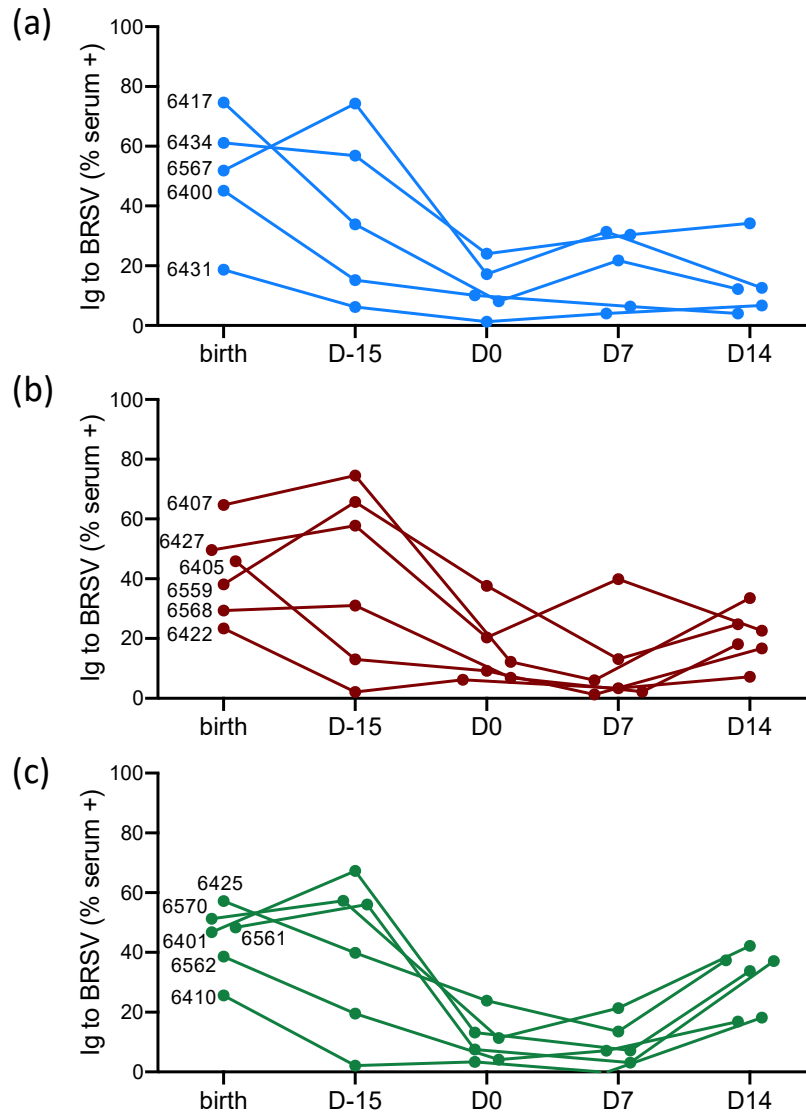

**Figure S1.** Kinetic of BRSV-specific antibody in calves from birth up to 2 weeks after vaccination.

Calves were vaccinated IM with preF or preF+N in ISA61 adjuvant, or mock (ISA61 alone) (D0). Blood was collected 48h after birth, 2 weeks before vaccination (D-15), at the time of vaccination (D0), 1 and 2 weeks after vaccination (D7 and d14). BRSV-specific Ab titers were expressed as % COD of the positive BRSV serum provided with the Svanova commercial kit. The decline observed from birth up to one week after vaccination can be related to the progressive disappearance of MDA. Calf ID is indicated in front of each plot. (a) Control group (ISA61) (b) preF group (preF formulated with ISA61) (c) preF+N group (preF and N formulated with ISA61)
